# Supplementary material
Source: Research Square preprint supplement (doi:10.21203/rs.3.rs-9163645/v1)
Supplement: Supplementary file 1 [file 5eb0cc85e07e825b13bf4629.docx]

**Knowledge and Understanding of Exercise Questionnaire**

**1. What do you think are the benefits of regular physical activity for older adults? (Select all that apply)** □ Promotes bone health □ Improves quality of life □ Reduces the risk of chronic diseases □ Lowers the risk of depression □ Prevents and controls obesity □ Other: __________________

**2. If you want to lose fat and weight, what do you think is the best dietary principle after adequate exercise? (Select one)** ○ High carbohydrates (grains, noodles, beans), moderate protein (dairy, meat, eggs), and low fat ○ Low carbohydrates, moderate protein, and low fat ○ Low carbohydrates, high protein, and low fat

**3. Which of the following activities do you think can increase physical activity levels? (Select all that apply)** □ Playing with a mobile phone □ Sweeping and mopping the floor □ Square dancing □ Walking to and from work □ Climbing stairs □ Other: __________________

**4. What components do you think a complete fitness workout should include? (Select all that apply)** □ Warm-up □ Main exercise / Core workout □ Cool-down □ Stretching □ Other: _________________

**5. Exercise Types**

**5.1 If you want to improve your aerobic endurance, which of the following activities would you choose? (Select all that apply)** □ Swimming □ Push-ups □ Jogging □ Planks □ Other: ________________

**5.2 If you want to improve your muscle strength and endurance, which of the following activities would you choose? (Select all that apply)** □ Swimming □ Push-ups □ Jogging □ Planks □ Other: ________________

**6. Which of the following do you think is NOT suitable for hydration during exercise? (Select one)** ○ Sports drinks ○ Carbonated drinks ○ Purified water ○ Lightly salted water

**7. To avoid exercise-related risks, what measures do you think should be taken? (Select all that apply)** □ Continue exercising even when feeling unwell □ Undergo health screening before exercising □ Warm up adequately before exercising □ Exercise in hot weather □ Exercise continuously for more than 2 hours □ Develop a suitable exercise plan □ Other: ________________

**8. When judging exercise intensity based on subjective feelings, how would you describe the feeling of moderate-intensity exercise? (Select one)** ○ Relaxed / Light ○ Slightly tiring / Somewhat hard ○ Very tiring / Very hard ○ Other: _____________

**9. To achieve basic health benefits, how many minutes of moderate-intensity exercise (e.g., brisk walking, Tai Chi) do you think older adults should engage in per week at a minimum? (Select one)** ○ 60 minutes ○ 120 minutes ○ 150 minutes ○ 180 minutes ○ Other: ________________

**10. Which of the following hydration methods during exercise do you think are correct? (Select all that apply)** □ Hydrating 2 hours before exercise □ Hydrating only when feeling thirsty □ Hydrating in small amounts frequently □ Drinking a large amount of water at once after exercise □ Other: __________________

**11. To increase muscle strength and endurance, how many days a week do you think older adults should engage in strength training at a minimum? (Select one)** ○ 1 day ○ 2 days ○ 3 days ○ 4 days ○ Other: __________________

**12. In the event of an ankle sprain during exercise, what should be done immediately? (Select one)** ○ Go to the hospital for examination immediately ○ Elevate the injured limb and apply a cold compress ○ Massage the injured area ○ Other: __________________
